# Supplementary material for: HIV-1 Vpr induces cell cycle arrest and enhances viral gene expression by depleting CCDC137
Source: eLife. 2020 Jun 15;9:e55806. doi: 10.7554/eLife.55806 (PMC7295576; doi:10.7554/eLife.55806)
Supplement: Supplementary file 2. [file elife-55806-supp2.xlsx]

## Sheet: Sheet1
	Alanine scanning	3-7sense	ATT CTC GAG CCA CCA TGG CGG CAG CTG CTG CCG CAG CAG CGG TGT CCA GGG TGC AGG CGG
		10-14sense	ATT CTC GAG CCA CCA TGG CGG GAG CTG GTC GCG GAG CAG CGG CGG CCG CGG CGG CGG CGG GTC CTG GGA GTC CCC GGC GAG
		16-20sese	ATT CTC GAG CCA CCA TGG CGG GAG CTG GTC GCG GAG CAG CGG TGT CCA GGG TGC AGG CGG CTG CTG CGG CTG CCC GGC GAG CGC GGG GGC GGC AGC AAG
		21-25sense	ATT CTC GAG CCA CCA TGG CGG GAG CTG GTC GCG GAG CAG CGG TGT CCA GGG TGC AGG CGG GTC CTG GGA GTC CCG CGG CAG CGG CGG CGC GGC AGC AAG TGC AGC CGC TGG GG
		26-30sense	ATT CTC GAG CCA CCA TGG CGG GAG CTG GTC GCG GAG CAG CGG TGT CCA GGG TGC AGG CGG GTC CTG GGA GTC CCC GGC GAG CGC GGG GGG CGG CGG CAG CGG CGC CGC TGG GGA AGC AGC GCC CAG C
		31-35sense	GTG CAG GCG GCG GCG GCG GCG CGC CCA GCC CCG TGG CCC GGG CTT CGC AGC AAA G
		31-35antisense	CTG GGC GCG CCG CCG CCG CCG CCT GCA CTT GCT GCC GCC CCC GCG CTC GCC GGG GAC
		36-40sense	AAG CAG GCC GCA GCC GCG GCG CCC GGG CTT CGC AGC AAA GAG AAG AAG AAA GTG AAC
		36-40antisense	GAA GCC CGG GCG CCG CGG CTG CGG CCT GCT TCC CCA GCG GCT GCA CTT GCT GCC GCC C
		41-45sense	CCG TGG GCC GCG GCT GCC GCC AAA GAG AAG AAG AAA GTG AAC TGC AAG CCC AAG AAC C
		41-45antisense	CTT CTC TTT GGC GGC AGC CGC GGC CCA CGG GGC TGG GCG CTG CTT CCC CAG CGG CTG
		46-50sense	CGC AGC GCA GCG GCG GCG GCA GTG AAC TGC AAG CCC AAG AAC CAG GAC
		46-50antisense	GTT CAC TGC CGC CGC CGC TGC GCT GCG AAG CCC GGG CCA CGG GGC TGG
		51-55sense	AAG AAA GCG GCA GCC GCG GCC AAG AAC CAG GAC GAA CAG GAG ATT CC
		51-55antisense	GTT CTT GGC CGC GGC TGC CGC TTT CTT CTT CTC TTT GCT GCG AAG CCC
		56-60sense	GCA AGC CCG CGG CTG CCG CGG CAC AGG AGA TTC CTT TCC GGC TCC GGG AG
		56-60antisense	CTC CTG TGC CGC GGC AGC CGC GGG CTT GCA GTT CAC TTT CTT CTT CTC
		61-65sense	GAC GAA GCG GCG GCT GCT GCC CGG CTC CGG GAG ATT ATG AGG AGC CGC
		61-65antisense	GAG CCG GGC AGC AGC CGC CGC TTC GTC CTG GTT CTT GGG CTT GCA GTT C
		66-70sense	CCT TTC GCA GCC GCG GCG GCT ATG AGG AGC CGC CAA GAG ATG AAA AAC
		66-70antisense	CCT CAT AGC CGC CGC GGC TGC GAA AGG AAT CTC CTG TTC GTC CTG GTT C
		71-75sense	GAG ATT GCG GCG GCT GCC GCA GAG ATG AAA AAC CCG ATC AGT AAC AAG
		71-75antisense	CAT CTC TGC GGC AGC CGC CGC AAT CTC CCG GAG CCG GAA AGG AAT CTC
		76-80sense	CGC CAA GCG GCG GCA GCC GCG ATC AGT AAC AAG AAG AGG AAG AAA GCA G
		76-80antisense	CTG ATC GCG GCT GCC GCC GCT TGG CGG CTC CTC ATA ATC TCC CGG AG
		81-85sense	AAC CCG GCC GCT GCC GCG GCG AGG AAG AAA GCA GCC CAG GTG ACC TTC
		81-85antisense	CTT CCT CGC CGC GGC AGC GGC CGG GTT TTT CAT CTC TTG GCG GCT CCT C
		86-90sense	CAA GAA GGC GGC GGC AGG AGG CCA GGT GAC CTT CAG AAA GAC ATT GGA G
		86-90antisense	CAC CTG GCC TCC TGC CGC CGC CTT CTT GTT ACT GAT CGG GTT TTT CAT C
		91-95sense	GCA GCC GCG GCG GCT GCC GCA AAG ACA TTG GAG AAG GAA GCA AAG GGA G
		91-95antisense	GTC TTT GCG GCA GCC GCC GCG GCT GCT TTC TTC CTC TTC TTG TTA CTG
		96-100sense	CCT TCA GAG CGG CAG CGG CGG CGG AAG CAA AGG GAG AGG AGC CCG ACA TC
		96-100antisense	GCT TCC GCC GCC GCT GCC GCT CTG AAG GTC ACC TGG GCT GCT TTC TTC CTC
		101-105sense	GAG AAG GCA GGA GCG GCA GCG GAG CCC GAC ATC GCA GTC CCC AAG TTC
		101-105antisense	GGG CTC CGC TGC CGC TCC TGC CTT CTC CAA TGT CTT TCT GAA GGT CAC
		106-110sense	GGA GAG GCG GCT GCC GCC GGA GTC CCC AAG TTC AAA CAG AGG AAG GGG
		106-110antisense	GGG GAC TCC GGC GGC AGC CGC CTC TCC CTT TGC TTC CTT CTC CAA TGT C
		111-115sense	CAT CGC AGC CGC CGC GGC TGC ACA GAG GAA GGG GGA GTC CGA CGG GGC C
		111-115antisense	CCT CTG TGC AGC CGC GGC GGC TGC GAT GTC GGG CTC CTC TCC CTT TGC
		116-120sense	GTT CAA AGC GGC GGC GGC GGC GTC CGA CGG GGC CTA TAT CCA CCG CAT G
		116-120antisense	GTC GGA CGC CGC CGC CGC CGC TTT GAA CTT GGG GAC TGC GAT GTC GGG
		121-125sense	GGG GAG GCC GCC GCG GGC GCT ATC CAC CGC ATG CAG CAA GAG GCC CAG
		121-125antisense	GTG GAT AGC GCC CGC GGC GGC CTC CCC CTT CCT CTG TTT GAA CTT GGG
		126-130sense	GCC TAT GCC GCC GCC GCG GCG CAA GAG GCC CAG CAT GTG CTG TTC CTC
		126-130antisense	CTC TTG CGC CGC GGC GGC GGC ATA GGC CCC GTC GGA CTC CCC CTT CCT C
		131-135sense	CAT GCA GGC AGC GGG CGC GGC TGT GCT GTT CCT CAG CAA GAA CCA GGC C
		131-135antisense	CAG CAC AGC CGC GCC CGC TGC CTG CAT GCG GTG GAT ATA GGC CCC GTC
		136-140sense	CAG CAT GCG GCG GCT GCC GCC AAG AAC CAG GCC ATC CGG CAG CCA GAG
		136-140antisense	GTT CTT GGC GGC AGC CGC CGC ATG CTG GGC CTC TTG CTG CAT GCG GTG
		141-145sense	CTC AGC GCG GCT GCG GGC GCC CGG CAG CCA GAG GTG CAG GCA GCT CCC
		141-145antisense	CTG CCG GGC GCC CGC AGC CGC GCT GAG GAA CAG CAC ATG CTG GGC CTC
		146-150sense	GCC ATC GCG GCG GCA GCG GCG CAG GCA GCT CCC AAG GAG AAG TCT GAG
		146-150antisense	TGC CTG CGC CGC TGC CGC CGC GAT GGC CTG GTT CTT GCT GAG GAA CAG
		151-155sense	GAG GTG GCG GGA GGT GCC GCG GAG AAG TCT GAG CAG AAA AAA GCA AAA AAA G
		151-155antisense	CTT CTC CGC GGC ACC TCC CGC CAC CTC TGG CTG CCG GAT GGC CTG GTT C
		CCDC137-LtoAsense	GCC TGG CAG GAG ATC GCA GAT GGC GCG GAT GGC TGC GAG CCC CGG TGG TGT GTC CCA GCC
		CCDC137-Laantisense	GGC TGG GAC ACA CCA CCG GGG CTC GCA GCC ATC CGC GCC ATC TGC GAT CTC CTG CCA GGC
	Vpr	Vpr-Q65R-antisense-SalI	CTG CTA TGT CGA CAC CCA ATT CTG AAA TGG ATA AAC AGC AGT TGT CGC AGA ATT CTT ATT ATG GC
		V1-dVpr3aaStop-sense	GTTAGGAAACTGACAGAGGACAGATGGAATAAGCCCCAGAAGACCAAGGGCCACAGAGGG
		V1-dVpr3aaStop-as	CCCTCTGTGGCCCTTGGTCTTCTGGGGCTTATTCCATCTGTCCTCTGTCAGTTTCCTAAC
		V1-Vpr-RemovalHA-sense	GTGTTAGGAAACTGACAGAGGACAGATGGAACAAGCCCCAGAAGACCAAGGGCCACAGAG
		V1-Vpr-RemovalHA-antisense	CTCTGTGGCCCTTGGTCTTCTGGGGCTTGTTCCATCTGTCCTCTGTCAGTTTCCTAACAC
		TF2625-HA-noMetVprSense	CTA TCC CTA TGA CGT CCC GGA CTA TGC AGG AGG TGA ACA AGC CCC AGA AGA CCA AGG GCC
		TF2625Vpr3end-NLsense	GAG CAA GAA ATG GAG CCA GTA GAT CCT AGA CTA GAG CCC TGG AAG CAT CCA GGA AGT C
		TF2625Vpr3end-NLas	GAC TTC CTG GAT GCT TCC AGG GCT CTA GTC TAG GAT CTA CTG GCT CCA TTT CTT GCT C
		TF2626Vpr3end-NLsense	GAG CAA GAA ATG GAG CCC GTA GAT CCT AAA CTA GAG CCC TGG AAG CAT CCA GGA AGT C
		TF2626Vpr3end-NLas	GAC TTC CTG GAT GCT TCC AGG GCT CTA GTT TAG GAT CTA CGG GCT CCA TTT CTT GCT C
		tfREJO-HA-noMetVprSense	CTA TCC CTA TGA CGT CCC GGA CTA TGC AGG AGG TGA ACA AGC CCC AGA AGA CCA AGG ACC
		tfREJO-Vpr3end-NLsense	GAG CGA GAA ATG GAG CCA GTA GAT CCT AGA CTA GAG CCC TGG AAG CAT CCA GGA AGT C
		tfREJO-Vpr3end-NLas	GAC TTC CTG GAT GCT TCC AGG GCT CTA GTC TAG GAT CTA CTG GCT CCA TTT CTC GCT C
		tfTRJO-Vpr3end-NLsense	GAG CAA GGA ATG GAG CCC GTA GAT CCT AGA CTA GAG CCC TGG AAG CAT CCA GGA AGT C
		tfTRJO-Vpr3end-NLas	GAC TTC CTG GAT GCT TCC AGG GCT CTA GTC TAG GAT CTA CGG GCT CCA TTC CTT GCT C
	shRNA	U6-promoter-KpnI	AATTAATTGGTACCGGCAGGAAGAGGCTATTTCCCATGATTCCTTCATATTTGCATATAC
		pLKO-afterEcoRI-as-KpnI	AATTAATTGGTACCGTGGATGAATACTGCCATTTGTCTCGAGGTCG
		CCDC137 shRNA target sequence I	CAGATGCTGCGGATGCTTCT
		CCDC137 shRNA target sequence II	GGTGAAACATGATGACAACA
	reporter cells	mClover-5-XhoI	ATT CTC GAG AGC ACC ATG GTG AGC AAG GGC GAG GAG CTG TTC
		mClover-hGeminin-S-KillNotXho	GAT ATC CAT GCA CAC TGG CGC CCG CTG GAG ATG AAT CCC AGT ATG
		mClover-hGeminin-AS-KillNotXho	CAT ACT GGG ATT CAT CTC CAG CGG GCG CCA GTG TGC ATG GAT ATC
		hGeminin110-3Stop-NotI	AAT TAA TTG CGG CCG CTT ACA GCG CCT TTC TCC GTT TTT CTG CCA CTT C
	Real Time PCR	Gag forward	GAGCTAGAACGATTCGCAGTTA
		Gag reverse	CTGTCTGAAGGGATGGTTGTAG
		GFP forward	GAGCGCACCATCTTCTTCAA
		GFP reverse	TCCTTGAAGTCGATGCCCTT
		actin forward	CATGTACGTTGCTATCCAGGC
		actin reverse	CTCCTTAATGTCACGCACGAT
	FISH	GFP probe 1	CGGTGAACAGCTCCTCGC
		GFP probe 2	GACCAGGATGGGCACCAC
		GFP probe 3	GTTTACGTCGCCGTCCAG
		GFP probe 4	ACACGCTGAACTTGTGGC
		GFP probe 5	GCCGGTGGTGCAGATGAA
		GFP probe 6	GGTGGTCACGAGGGTGGG
		GFP probe 7	ACTGCACGCCGTAGGTCA
		GFP probe 8	TCGGGGTAGCGGCTGAAG
		GFP probe 9	AGTCGTGCTGCTTCATGT
		GFP probe 10	GGCATGGCGGACTTGAAG
		GFP probe 11	CTCCTGGACGTAGCCTTC
		GFP probe 12	GCCGTCGTCCTTGAAGAA
		GFP probe 13	TCGGCGCGGGTCTTGTAG
		GFP probe 14	TGTCGCCCTCGAACTTCA
		GFP probe 15	CTCGATGCGGTTCACCAG
		GFP probe 16	TGAAGTCGATGCCCTTCA
		GFP probe 17	CAGGATGTTGCCGTCCTC
		GFP probe 18	CGTTGTGGCTGTTGTAGT
		GFP probe 19	GCTTGTCGGCCATGATAT
		GFP probe 20	GTCCTCGATGTTGTGGCG
		GFP probe 21	GTAGTGGTCGGCGAGCTG
		GFP probe 22	CGATGGGGGTGTTCTGCT
		GFP probe 23	TTGTCGGGCAGCAGCACG
		GFP probe 24	GACTGGGTGCTCAGGTAG
		GFP probe 25	TTGGGGTCTTTGCTCAGG
		GFP probe 26	CATGTGATCGCGCTTCTC
		GFP probe 27	GGTCACGAACTCCAGCAG
		GFP probe 28	CTTGTACAGCTCGTCCAT
	cDNA	Accession number	Primers
	CCDC137-Xho-kozak	NM_199287.3	ATT CTC GAG GCC ACC ATG GCG GGA GCT GGT CGC GGA GCA GCG
	CCDC137-3NonStop-NotI		AAT TAA TTG CGG CCG CCC AGC TGC GGC TCT GGC TTC TTC CGG G
	BOP1-5XhoI	NM_015201.5	ATT CTC GAG GCC ACC ATG GCG GGT TCG CGG GGT GCG GGG CGC AC
	BOP1-3StopNotI		AAT TAA TTG CGG CCG CTA GGT GAA GAG GCG GAC AGT CCC GTC TG
	NCL-5XhoI	NM_005381.3	ATT CTC GAG GCC ACC ATG GTG AAG CTC GCG AAG GCA GGT AAA AAT C
	NCL-3StopNotI		AAT TAA TTG CGG CCG CTA TTC AAA CTT CGT CTT CTT TCC TTG TGG
	MKI67IP-5XhoI	BC022990.1	ATT CTC GAG GCC ACC ATG GCG ACT TTT TCT GGC CCG GCT GGG CC
	MKI67IP-3StopNotI		AAT TAA TTG CGG CCG CTC ACT GAT TGC TGC TTC TTC GTC TTT TTT TCC
	WDR12-5-XhoI	NM_018256.4	ATT CTC GAG GCC ACC ATG GCT CAG CTC CAA ACA CGC TTC TAC
	WDR12-3StopNotI		AAT TAA TTG CGG CCG CTC ATG CCC CAA CAT GGG AAG TGG TAG G
	HNRNPA2B1-5XhoI	NM_031243.3	ATT CTC GAG GCC ACC ATG GAG AAA ACT TTA GAA ACT GTT CCT TTG
	HNRNPA2B1-3StopNotI		AAT TAA TTG CGG CCG CTA GTA TCG GCT CCT CCC ACC ATA ACC CCC AC
	DHX9-5SalI	NM_001357.5	ATT ATT GTC GAC GCC ACC ATG GGT GAC GTT AAA AAT TTT CTG TAT GCC TGG
	DHX9-3StopNotI		AAT TAA TTG CGG CCG CTA ATA GCC GCC ACC TCC TCT TCC CTG TCC
	DHX9-5BamHI	NM_001357.5	ATT ATT GGA TCC GCC ACC ATG GGT GAC GTT AAA AAT TTT CTG TAT GCC TGG TG
	DHX9-3BamHIStop		AAT TGG ATC CTA CGT AGA ATC GAG ACC GAG GAG AGG GTT AGG GAT AGG CTT ACC ATA GCC GCC ACC TCC TCT TCC CTG TCC AAA GTAG
	HNRNPU-5BamHI	NM_031844.3	ATT ATT GGA TCC GCC ACC ATG AGT TCC TCG CCT GTT AAT GTA AAA AAG CTG
	HNRNPU-3BamHIStop		AAT TGG ATC CTA CGT AGA ATC GAG ACC GAG GAG AGG GTT AGG GAT AGG CTT ACC ATA ATA TCC TTG GTG ATA ATG CTG ACT CCA TGG
	CREB1	BC010636, BC010636.1	human ORF lentiviral library
	CREB3L1	BC014097, BC014097.1	human ORF lentiviral library
	HNRNP D	BC002401, BC002401.1	human ORF lentiviral library
	HNRNP F	BC004254, BC004254.1	human ORF lentiviral library
	POC1A	BC119692, BC119692.2	human ORF lentiviral library
	PPM1G	BC000057, BC000057.2	human ORF lentiviral library
	PES1	BC032489, BC032489.1	human ORF lentiviral library
	WDR18	BC001648, BC001648.2	human ORF lentiviral library
	WDR74	BC006351, BC006351.2	human ORF lentiviral library
	MAK16	BC050528, BC050528.1	human ORF lentiviral library
	NOC2L	BC003555, BC003555.1	human ORF lentiviral library
	RRS1	BC001811, BC001811.2	human ORF lentiviral library
	NIP7	BC015941, BC015941.1	human ORF lentiviral library
	HNRNP A1	BC002355, BC002355.2	human ORF lentiviral library
	HNRNP H	BC001348, BC001348.2	human ORF lentiviral library
	HNRNP K	BC014980, BC014980.1	human ORF lentiviral library
	HNRNP R	BC001449, BC001449.2	human ORF lentiviral library
	HNRNP C	BC003394, BC003394.1	human ORF lentiviral library
	HNRNP A2B1	BC000506, BC000506.2	human ORF lentiviral library
